# Supplementary material
Source: PubMed Central journal article supplement (PMC4091116)
Supplement: psb-8-e25689-s01.pdf [file psb-8-e25689-s01.pdf]

## **Supplemental Material to:**

**Yehoram Leshem, Alex Levine**

**Zooming into sub-organellar localization of reactive oxygen species in guard cell chloroplasts during abscisic acid and methyl jasmonate treatments**

**Plant Signaling & Behavior 2013; 8(10)**

**<http://dx.doi.org/10.4161/psb.25689>**

**[www.landesbioscience.com/journals/psb/article/25689](http://www.landesbioscience.com/journals/psb/article/25689)**

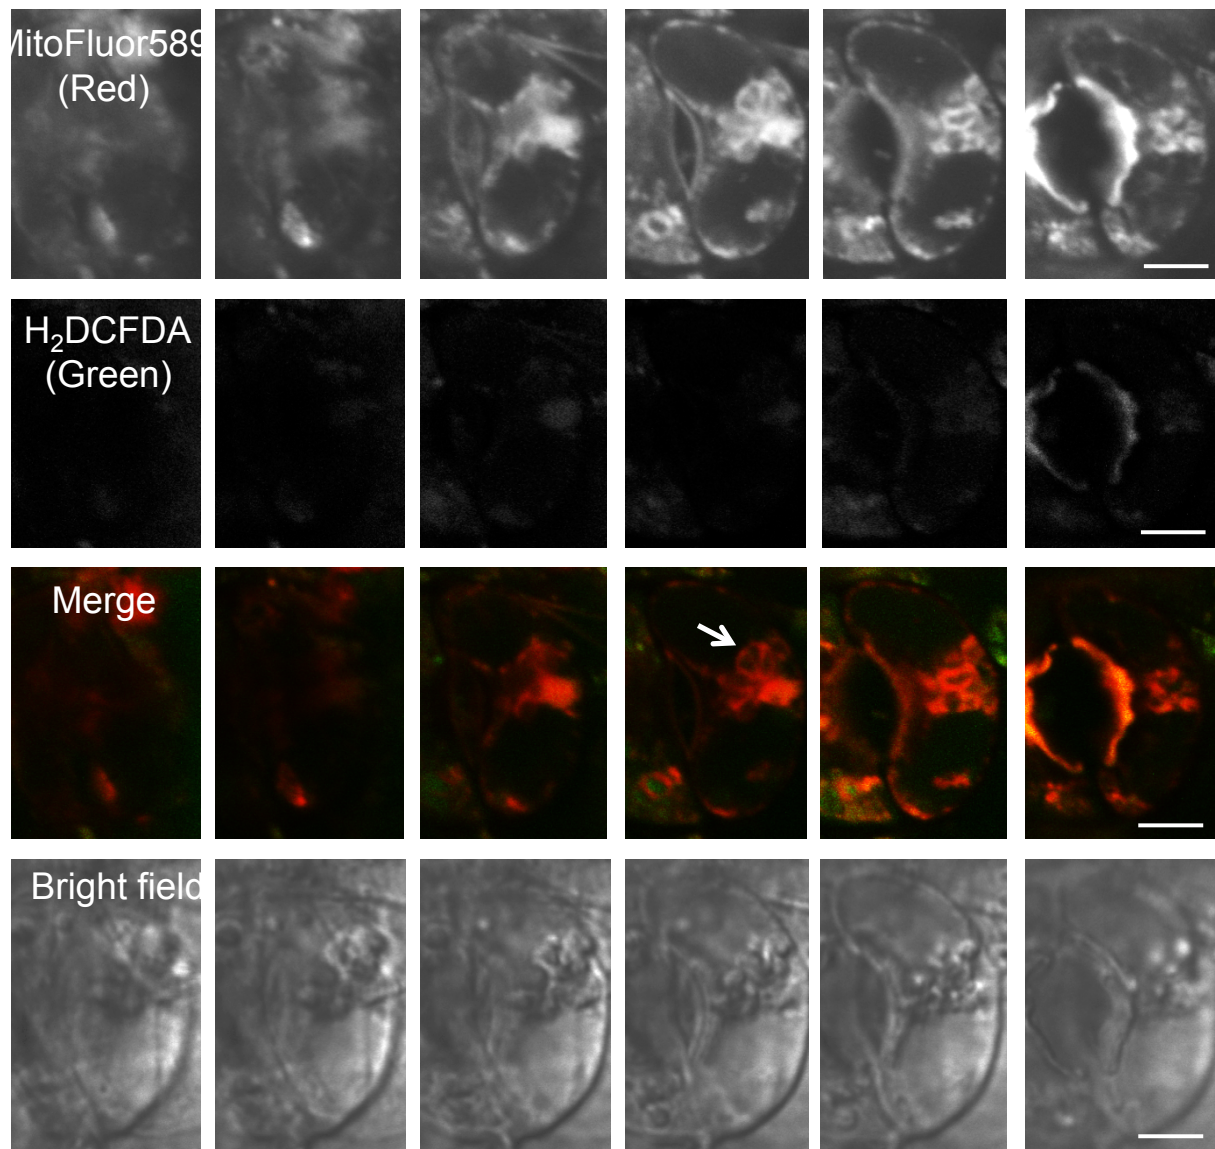

**Supplemental Figure 1.**

Complete Z stack image series of the Control treatment presented in Figure 2. Experimental procedure was as in Figure 2. White arrow in merge series point to the chloroplast presented in Figure 2. Scale bar = 5 $\mu$ m

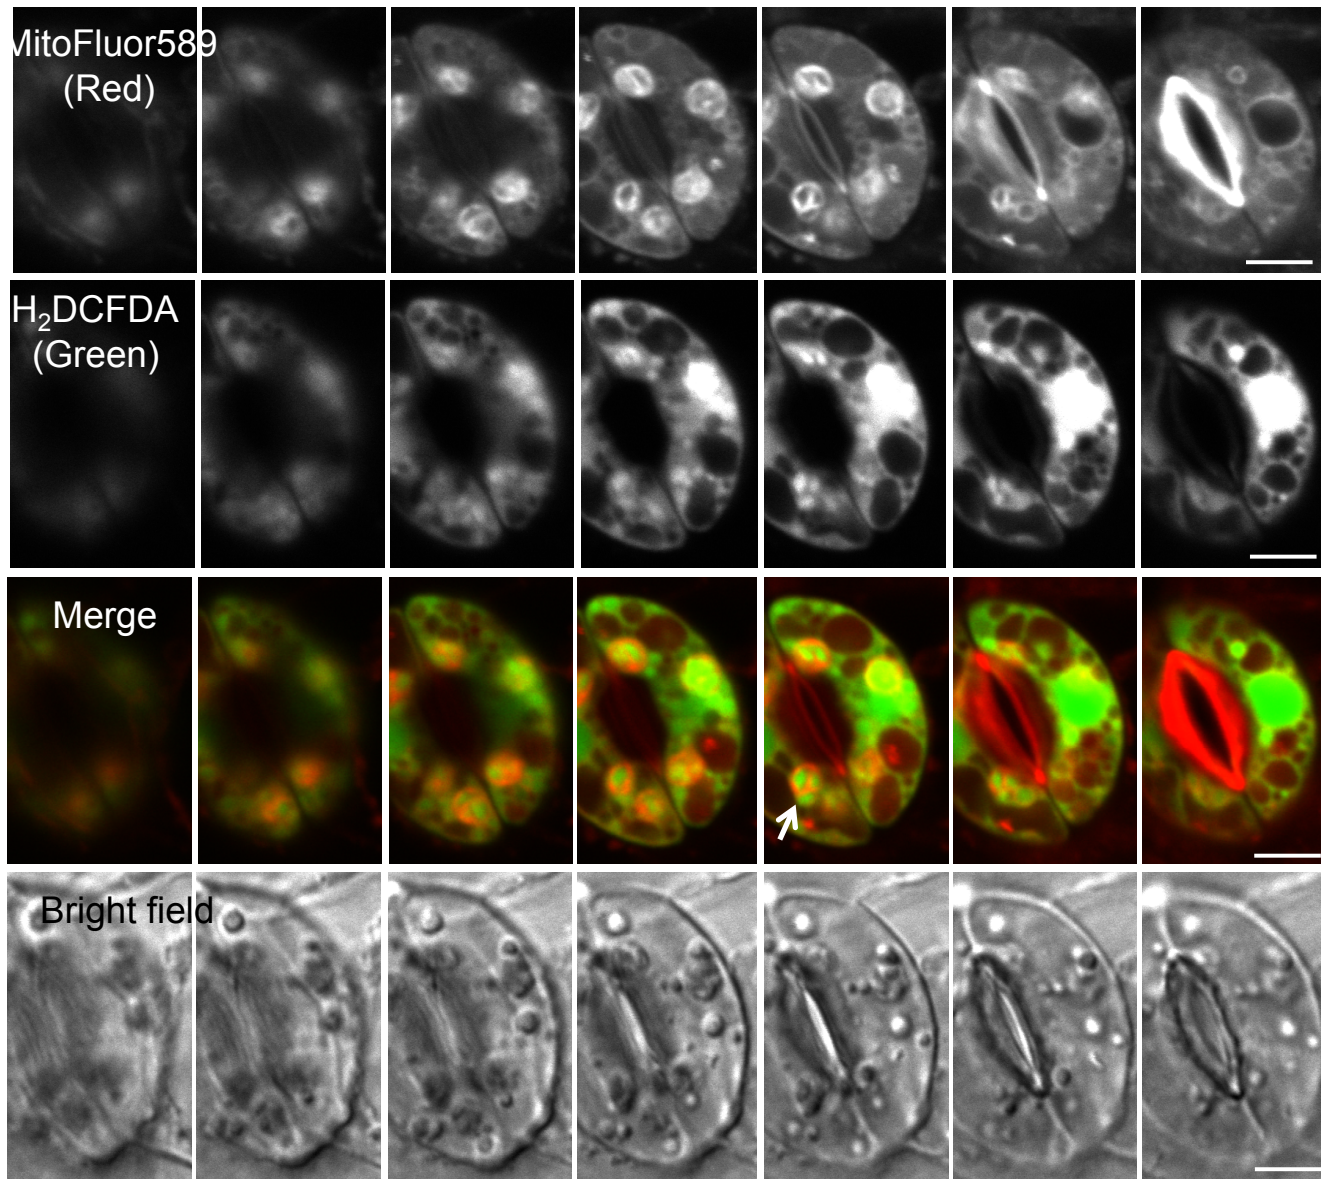

**Supplemental Figure 2.**

Complete Z stack image series of the ABA treatment presented in Figure 2. Experimental procedure was as in Figure 2. White arrow in merge series points to the chloroplast presented in Figure 2. Scale bar = 5µm

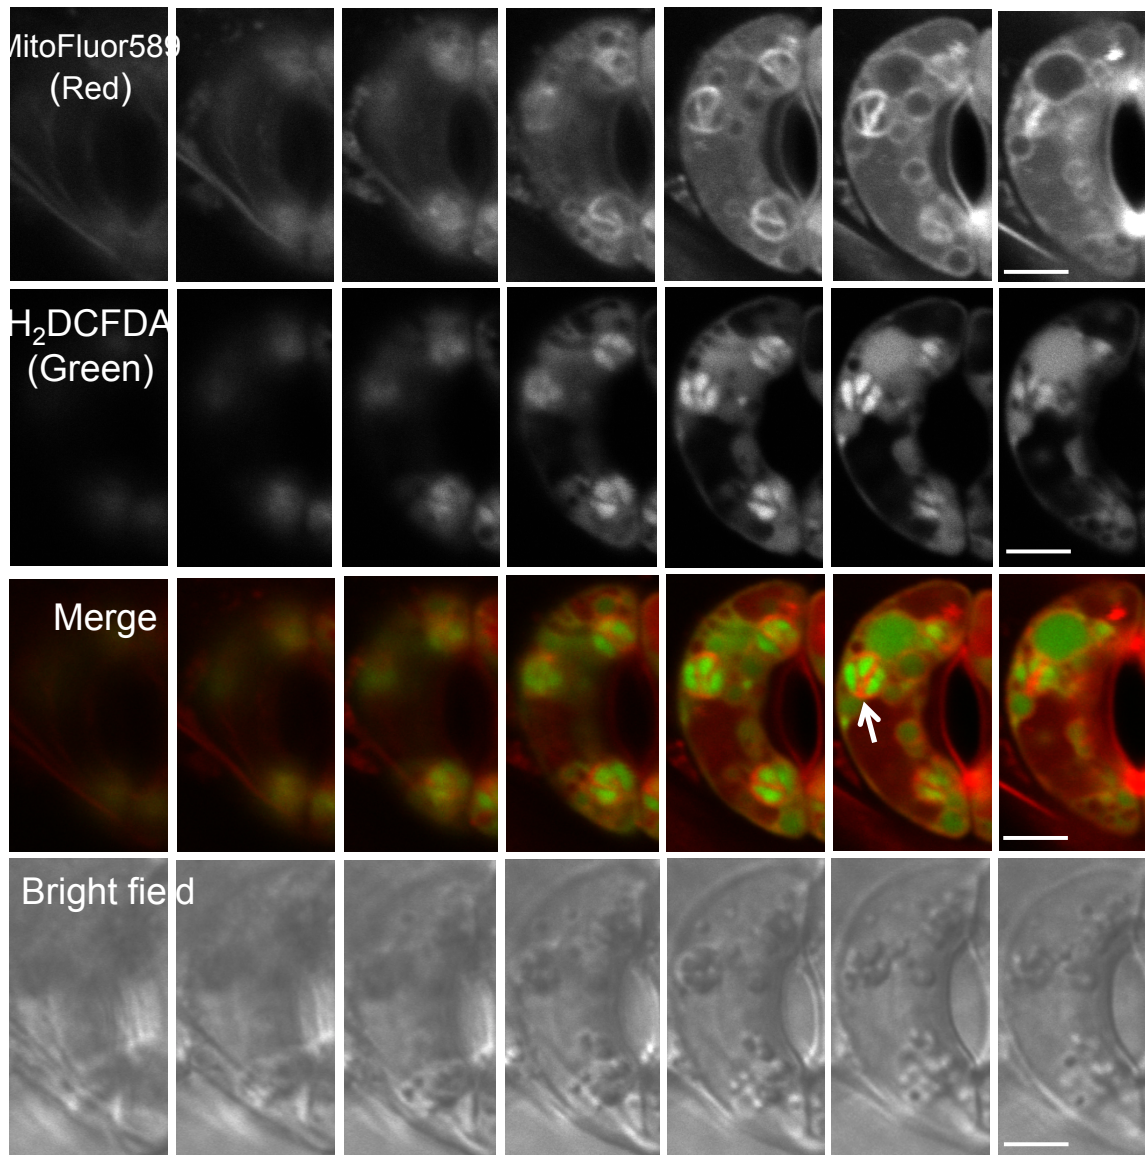

### Supplemental Figure 3.

Complete Z stack image series of the MJ treatment presented in Figure 2. Experimental procedure was as in Figure 2. White arrow in merge series points to the chloroplast presented in Figure 2. Scale bar = 5 μm

## **Supplementary material**

### **Supplemental Figure 1.**

The complete Z stack image series of the Control treatment presented in Figure 2. Experimental procedure was as in Figure 2. White arrow in merge series point to the chloroplast presented in Figure 2. Scale bar = 5 $\mu$ m

### **Supplemental Figure 2.**

The complete Z stack image series of the ABA treatment presented in Figure 2. Experimental procedure was as in Figure 2. White arrow in merge series points to the chloroplast presented in Figure 2. Scale bar = 5 $\mu$ m

### **Supplemental Figure 3.**

The complete Z stack image series of the MJ treatment presented in Figure 2. Experimental procedure was as in Figure 2. White arrow in merge series points to the chloroplast presented in Figure 2. Scale bar = 5 $\mu$ m
